# Supplementary material
Source: publisher figshare collection journal article supplement (https://acs.figshare.com/ndownloader/files/5724642)
Supplement: Supplementary file 1 [file 5724642]

Supporting Information for: Miller, Kennedy, Kemp: Solubilized, Spaced Polyalanines:.....

**Supporting Information****Table S1.** Mass Spectroscopy Data.

| Peptide                                                                              | <i>m/z</i> Found (Expected)                                                                                               |
|--------------------------------------------------------------------------------------|---------------------------------------------------------------------------------------------------------------------------|
| WK <sub>4</sub> Inp <sub>2</sub> 'LA <sub>4</sub> 'LInp <sub>2</sub> K <sub>4</sub>  | 728.64 (728.49), 546.78 (546.62), 437.64 (437.50), 364.98 (364.75), 313.04 (312.79)                                       |
| WK <sub>4</sub> Inp <sub>2</sub> 'LA <sub>12</sub> 'LInp <sub>2</sub> K <sub>4</sub> | 1375.79 (1376.38), 917.54 (917.92), 688.40 (688.69)                                                                       |
| WK <sub>4</sub> Inp <sub>2</sub> 'LA <sub>13</sub> 'LInp <sub>2</sub> K <sub>4</sub> | 941.79 (941.60), 706.74 (706.45), 565.53 (565.36), 471.49 (471.31), 404.28 (404.12), 353.92 (353.73)                      |
| WK <sub>4</sub> Inp <sub>2</sub> 'LA <sub>14</sub> 'LInp <sub>2</sub> K <sub>4</sub> | 965.63 (965.28), 724.53 (724.21), 579.70 (579.57), 483.28 (483.14), 414.39 (414.27), 362.78 (362.61)                      |
| WK <sub>4</sub> Inp <sub>2</sub> 'LA <sub>15</sub> 'LInp <sub>2</sub> K <sub>4</sub> | 989.15 (988.96), 742.25 (741.97), 593.92 (593.78), 495.14 (494.98), 424.56 (424.42), 371.64 (371.49)                      |
| WK <sub>4</sub> Inp <sub>2</sub> 'LA <sub>16</sub> 'LInp <sub>2</sub> K <sub>4</sub> | 1012.92 (1012.64), 760.03 (759.73), 608.15 (607.99), 507.00 (506.82), 434.73 (434.56), 380.57 (380.37), 338.44 (338.22)   |
| WK <sub>4</sub> Inp <sub>2</sub> 'LA <sub>17</sub> 'LInp <sub>2</sub> K <sub>4</sub> | 1035.83 (1036.32), 777.03 (777.49), 662.04 (662.19), 518.45 (518.66)                                                      |
| WK <sub>4</sub> Inp <sub>2</sub> 'LA <sub>18</sub> 'LInp <sub>2</sub> K <sub>4</sub> | 1060.15 (1060.00), 795.47 (795.25), 636.61 (636.40), 530.65 (530.50), 455.02 (454.86), 398.29 (398.13), 354.17 (354.00)   |
| WK <sub>4</sub> Inp <sub>2</sub> 'LA <sub>19</sub> 'LInp <sub>2</sub> K <sub>4</sub> | 1624.98 (1625.01), 1083.70 (1083.68), 813.11 (813.01)                                                                     |
| WK <sub>4</sub> Inp <sub>2</sub> 'LA <sub>20</sub> 'LInp <sub>2</sub> K <sub>4</sub> | 1107.26 (1107.36), 830.75 (830.77), 664.79 (664.82), 554.27 (554.18)                                                      |
| WK <sub>4</sub> Inp <sub>2</sub> 'LA <sub>21</sub> 'LInp <sub>2</sub> K <sub>4</sub> | 1130.94 (1131.03), 848.25 (848.53), 678.71 (679.02), 566.06 (566.02)                                                      |
| WK <sub>4</sub> Inp <sub>2</sub> 'LA <sub>22</sub> 'LInp <sub>2</sub> K <sub>4</sub> | 1154.82 (1154.71), 866.52 (866.29), 693.45 (693.23), 578.00 (577.86), 495.61 (495.45), 433.77 (433.65), 385.77 (385.58)   |
| WK <sub>4</sub> Inp <sub>2</sub> 'LA <sub>23</sub> 'LInp <sub>2</sub> K <sub>4</sub> | 1178.49 (1178.39), 884.32 (884.05), 707.87 (707.44), 589.87 (589.70), 505.76 (505.60), 442.70 (442.53), 393.62 (393.47)   |
| WK <sub>4</sub> Inp <sub>2</sub> 'LA <sub>24</sub> 'LInp <sub>2</sub> K <sub>4</sub> | 1202.61 (1202.07), 902.00 (901.81), 722.04 (721.65), 601.68 (601.54), 515.91 (515.75), 451.51 (451.41), 401.54 (401.36)   |
| WK <sub>5</sub> Inp <sub>2</sub> 'LA <sub>28</sub> 'LInp <sub>2</sub> K <sub>5</sub> | 1382.95 (1382.18), 1037.23 (1036.89), 830.01 (829.71), 692.03 (691.60), 593.19 (592.94), 519.17 (518.95), 461.59 (461.40) |
| WK <sub>5</sub> Inp <sub>2</sub> 'LA <sub>29</sub> 'LInp <sub>2</sub> K <sub>5</sub> | 1406.44 (1405.86), 1054.64 (1054.65), 844.22 (843.92), 703.80 (703.44), 603.28 (603.09), 528.07 (527.83), 469.46 (469.29) |
| WK <sub>5</sub> Inp <sub>2</sub> 'LA <sub>35</sub> 'LInp <sub>2</sub> K <sub>5</sub> | 1547.50 (1547.94), 1160.95 (1161.20), 928.99 (929.17), 774.30 (774.47), 663.92 (663.98), 581.01 (581.11), 516.56 (516.65) |
| WK <sub>5</sub> Inp <sub>2</sub> 'LA <sub>36</sub> 'LInp <sub>2</sub> K <sub>5</sub> | 1571.19 (1571.62), 1178.63 (1178.96), 943.08 (943.37), 786.09 (786.31), 674.00 (674.13), 589.86 (589.99), 524.43 (524.54) |
| WK <sub>6</sub> Inp <sub>2</sub> 'LA <sub>44</sub> 'LInp <sub>2</sub> K <sub>6</sub> | 1108.74 (1108.27), 924.18 (923.73), 792.33 (791.91), 693.50 (693.05), 616.44 (616.15), 554.91 (554.64), 504.58 (504.31)   |
| WK <sub>6</sub> Inp <sub>2</sub> 'LA <sub>45</sub> 'LInp <sub>2</sub> K <sub>6</sub> | 936.18 (935.57), 702.69 (701.93), 624.54 (624.05), 562.25 (561.74), 511.28 (510.77)                                       |
| WK <sub>2</sub> Inp <sub>2</sub> 'LA <sub>4</sub> 'LInp <sub>2</sub> K <sub>2</sub>  | 836.35 (836.04), 557.77 (557.70), 418.59 (418.53), 335.11 (335.02)                                                        |
| WK <sub>3</sub> Inp <sub>2</sub> 'LA <sub>4</sub> 'LInp <sub>2</sub> K <sub>3</sub>  | 964.58 (964.14), 643.26 (643.10), 482.68 (482.57), 386.45 (386.26), 322.28 (322.05)                                       |
| WK <sub>5</sub> Inp <sub>2</sub> 'LA <sub>4</sub> 'LInp <sub>2</sub> K <sub>5</sub>  | 814.26 (813.89), 611.00 (610.67), 489.08 (488.74), 407.60 (407.45), 349.71 (349.39), 306.09 (305.84)                      |
| WK <sub>6</sub> Inp <sub>2</sub> 'LA <sub>4</sub> 'LInp <sub>2</sub> K <sub>6</sub>  | 899.88 (899.28), 675.03 (674.72), 540.14 (539.97), 450.42 (450.15), 386.20 (385.98), 338.17 (337.86)                      |
| WK <sub>7</sub> Inp <sub>2</sub> 'LA <sub>4</sub> 'LInp <sub>2</sub> K <sub>7</sub>  | 739.25 (738.76), 591.58 (591.21), 493.17 (492.84), 422.81 (422.58), 370.19 (369.89), 329.17 (328.90)                      |
| WK <sub>2</sub> Inp <sub>2</sub> 'LA <sub>12</sub> 'LInp <sub>2</sub> K <sub>2</sub> | 1120.43 (1120.19), 747.43 (747.13), 560.80 (560.60), 448.91 (448.68)                                                      |

Supporting Information for: Miller, Kennedy, Kemp: Solubilized, Spaced Polyalanines:.....

| Peptide                                                                                                 | <i>m/z</i> Found (Expected)                                                                                             |
|---------------------------------------------------------------------------------------------------------|-------------------------------------------------------------------------------------------------------------------------|
| WK <sub>3</sub> Inp <sub>2</sub> 'LA <sub>12</sub> 'LInp <sub>2</sub> K <sub>3</sub>                    | 832.31 (832.53), 624.27 (624.65), 499.76 (499.92), 416.60 (416.77), 357.31 (357.37)                                     |
| WK <sub>7</sub> Inp <sub>2</sub> 'LA <sub>12</sub> 'LInp <sub>2</sub> K <sub>7</sub>                    | 1173.84 (1174.11), 880.57 (880.84), 704.75 (704.87), 587.27 (587.56), 503.66 (503.77), 440.80 (440.92), 391.97 (392.04) |
| WK <sub>3</sub> Inp <sub>2</sub> 'LA <sub>19</sub> 'LInp <sub>2</sub> K <sub>3</sub>                    | 998.24 (998.28), 748.98 (748.96), 599.20 (599.37), 499.64 (499.64), 428.35 (428.41)                                     |
| WK <sub>7</sub> Inp <sub>2</sub> 'LA <sub>19</sub> 'LInp <sub>2</sub> K <sub>7</sub>                    | 804.31 (804.32), 670.48 (670.44), 574.88 (574.80), 503.15 (503.08), 477.31 (447.29), 402.76 (402.67)                    |
| K <sub>4</sub> Inp <sub>2</sub> 'LA <sub>19</sub> 'LInp <sub>2</sub> K <sub>4</sub> W                   | 1083.62 (1083.68), 812.99 (813.01), 650.57 (650.61), 542.27 (542.34), 464.92 (465.01), 406.97 (407.01)                  |
| WK <sub>4</sub> Inp <sub>2</sub> 'LA <sub>19</sub> 'LInp <sub>2</sub> K <sub>4</sub> W                  | 859.32 (859.53), 687.78 (687.82), 573.23 (573.36), 491.60 (491.59), 430.14 (430.27), 382.53 (382.57)                    |
| WK <sub>4</sub> Inp <sub>3</sub> A <sub>19</sub> Inp <sub>3</sub> K <sub>4</sub>                        | 1082.40 (1082.33), 812.09 (812.00), 649.87 (649.80), 541.76 (541.67), 464.48 (464.43), 406.59 (406.50)                  |
| WK <sub>4</sub> P <sub>3</sub> A <sub>19</sub> P <sub>3</sub> K <sub>4</sub>                            | 1054.77 (1054.30), 791.16 (790.98), 633.15 (632.98), 527.79 (527.65), 452.54 (452.42), 396.12 (395.99)                  |
| WK <sub>4</sub> Inp <sub>2</sub> 'LA <sub>28</sub> 'LInp <sub>2</sub> K <sub>4</sub>                    | 973.23 (972.84), 778.85 (778.48), 649.18 (648.90), 556.45 (556.34), 487.08 (486.93), 433.08 (432.93)                    |
| WK <sub>7</sub> Inp <sub>2</sub> 'LA <sub>28</sub> 'LInp <sub>2</sub> K <sub>7</sub>                    | 1165.24 (1164.98), 932.52 (932.19), 777.26 (776.99), 666.41 (666.14), 583.19 (583.00), 518.54 (518.33), 466.78 (466.60) |
| WK <sub>5</sub> P <sub>3</sub> A <sub>28</sub> P <sub>3</sub> K <sub>5</sub>                            | 1014.96 (1014.86), 812.49 (812.09), 677.26 (676.91), 580.51 (580.35), 508.07 (507.93), 451.78 (451.61), 406.79 (406.55) |
| WK <sub>4</sub> Inp <sub>2</sub> 'L                                                                     | 526.43 (526.36), 351.26 (351.24), 263.64 (263.68)                                                                       |
| Wβ <sub>3</sub> G <sub>3</sub> A <sub>12</sub> G <sub>3</sub> β <sub>3</sub>                            | 1915.40 (1914.97), 957.93 (957.99), 639.02 (639.00), 479.62 (479.50), 383.61 (383.80)                                   |
| W <sup>h</sup> K <sub>3</sub> G <sub>3</sub> A <sub>12</sub> G <sub>3</sub> <sup>h</sup> K <sub>3</sub> | 1126.32 (1126.18), 751.25 (751.12), 563.73 (563.59), 451.21 (451.08), 376.14 (376.06), 322.54 (322.48)                  |
| WK <sub>3</sub> G <sub>2</sub> A <sub>12</sub> G <sub>2</sub> K <sub>3</sub>                            | 1027.32 (1027.11), 685.14 (685.08), 514.17 (514.06), 411.36 (411.45), 343.13 (343.04), 294.24 (294.18)                  |
| WK <sub>3</sub> G <sub>2</sub> A <sub>12</sub> G <sub>4</sub> K <sub>3</sub>                            | 1084.04 (1084.13), 723.18 (723.09), 542.64 (542.57), 434.21 (434.26), 362.15 (362.05), 310.52 (310.47)                  |
| WK <sub>3</sub> G <sub>3</sub> A <sub>12</sub> G <sub>3</sub> K <sub>3</sub>                            | 1084.23 (1084.13), 723.24 (723.09), 542.64 (542.57), 434.33 (434.26), 362.09 (362.05), 310.52 (310.47)                  |
| WK <sub>3</sub> G <sub>4</sub> A <sub>12</sub> G <sub>2</sub> K <sub>3</sub>                            | 1084.04 (1084.13), 723.12 (723.09), 542.64 (542.57), 434.27 (434.26), 362.15 (362.05), 310.52 (310.47)                  |
| WK <sub>3</sub> G <sub>4</sub> A <sub>12</sub> G <sub>4</sub> K <sub>3</sub>                            | 1141.36 (1141.15), 761.23 (761.10), 571.18 (571.08), 457.20 (457.07), 381.19 (381.06), 326.87 (326.76)                  |
| WK <sub>3</sub> G <sub>5</sub> A <sub>12</sub> G <sub>5</sub> K <sub>3</sub>                            | 1198.21 (1198.17), 799.31 (799.12), 599.71 (599.59), 479.97 (479.87), 400.10 (400.06), 343.14 (343.06)                  |
| WK <sub>3</sub> G <sub>7</sub> A <sub>12</sub> G <sub>7</sub> K <sub>3</sub>                            | 1312.62 (1312.22), 875.33 (875.15), 656.70 (656.61), 525.62 (525.49), 438.05 (438.08), 375.76 (375.64)                  |
| WK <sub>3</sub> InpA <sub>12</sub> InpK <sub>3</sub>                                                    | 1024.38 (1024.13), 683.17 (683.09), 512.64 (512.57), 410.34 (410.26), 342.11 (342.05), 293.35 (293.33)                  |
| WK <sub>3</sub> Inp <sub>2</sub> A <sub>12</sub> Inp <sub>2</sub> K <sub>3</sub>                        | 1135.42 (1135.20), 757.46 (757.14), 568.17 (568.11), 454.77 (454.69), 379.20 (379.07), 325.21 (325.06)                  |
| WK <sub>3</sub> Inp <sub>3</sub> A <sub>12</sub> Inp <sub>3</sub> K <sub>3</sub>                        | 831.35 (831.18), 623.75 (623.64), 499.28 (499.11), 416.14 (416.10), 356.94 (356.80)                                     |

**Table S2.** Ellipticities of peptides with Gly IS.

| <b>A</b> $\text{WK}_3\text{G}_j\text{A}_{12}\text{G}_k\text{K}_3$ |                                                                                             |       |       |
|-------------------------------------------------------------------|---------------------------------------------------------------------------------------------|-------|-------|
|                                                                   | $-\left[\theta\right]_{222,\text{molar}} \times 10^{-5} \text{ deg cm}^2 \text{ dmol}^{-1}$ |       |       |
| $j,k$                                                             | 2 °C                                                                                        | 25 °C | 60 °C |
| 2,2                                                               | 1.41                                                                                        | 0.81  | 0.49  |
| 2,4                                                               | 1.22                                                                                        | 0.66  | 0.34  |
| 3,3                                                               | 1.66                                                                                        | 0.91  | 0.37  |
| 4,2                                                               | 1.95                                                                                        | 1.15  | 0.58  |
| 4,4                                                               | 1.88                                                                                        | 0.99  | 0.44  |
| 5,5                                                               | 1.98                                                                                        | 1.11  | 0.47  |
| 7,7 <sup>a</sup>                                                  | 2.07                                                                                        | 1.30  | 0.64  |

  

| <b>B</b> $\text{WX}_3\text{G}_3\text{A}_{12}\text{G}_3\text{X}_3$ |                                                                                             |       |       |
|-------------------------------------------------------------------|---------------------------------------------------------------------------------------------|-------|-------|
|                                                                   | $-\left[\theta\right]_{222,\text{molar}} \times 10^{-5} \text{ deg cm}^2 \text{ dmol}^{-1}$ |       |       |
| $X$                                                               | 2 °C                                                                                        | 25 °C | 60 °C |
| K                                                                 | 1.66                                                                                        | 0.91  | 0.37  |
| $\beta^b$                                                         | 2.07                                                                                        | 1.24  | 0.77  |
| <sup>h</sup> K <sup>c</sup>                                       | 1.76                                                                                        | 1.01  | 0.49  |

<sup>a</sup> Precipitated at 60 °C in 100 mM NaCl solution. <sup>b</sup>  $\beta$  =  $\beta$ -aminoalanine. <sup>c</sup> <sup>h</sup>K = S-NH<sub>2</sub>(CH<sub>2</sub>)<sub>5</sub>CH(NH<sub>2</sub>)CO<sub>2</sub>H (homolysine).

**Table S3.** Experimental AUC conditions for peptides of the form  $WK_mInp_2^tLA_n^tLInp_2K_m$ .

| Plot           | $n^a$           | Solvent          | Concentration<br>Peptide<br>( $\mu$ M) | NaCl<br>(M) | $\lambda$<br>(nm) | krpm | T °C | Slope | MW<br>(D) | MW <sub>exp</sub><br>(D) |
|----------------|-----------------|------------------|----------------------------------------|-------------|-------------------|------|------|-------|-----------|--------------------------|
| A              | 12              | H <sub>2</sub> O | 50                                     | 0.01        | 280               | 40   | 4.0  | 0.482 | 2752      | 2911                     |
| B <sup>b</sup> | 19              | H <sub>2</sub> O | 71                                     | 0.01        | 280               | 40   | 4.0  | 0.523 | 3250      | 3050                     |
| C <sup>c</sup> | 28              | H <sub>2</sub> O | 72                                     | 0.10        | 280               | 47   | 2.0  | 0.895 | 3890      | 3671                     |
| D              | 28              | H <sub>2</sub> O | 14                                     | —           | 225               | 45   | 5.0  | 0.235 | 3890      | 1054                     |
| E              | 28              | D <sub>2</sub> O | 14                                     | —           | 223               | 45   | 5.0  | 0.138 | 3890      | 968                      |
| F              | 28              | D <sub>2</sub> O | 7.1                                    | 0.10        | 225               | 45   | 5.0  | 0.639 | 3890      | 4480                     |
| G <sup>d</sup> | 45 <sup>a</sup> | H <sub>2</sub> O | 10                                     | —           | 225               | 45   | 2.0  | 0.518 | 5098      | 2204                     |
| H              | 45 <sup>a</sup> | D <sub>2</sub> O | 8.0                                    | —           | 223               | 45   | 5.0  | 0.272 | 5098      | 1790                     |

<sup>a</sup> All of these peptides have solubilizers  $K_m$ ,  $m = 4$  except for those with  $n = 45$ , in which case  $m = 6$ . <sup>b</sup> See plot marked "A<sub>19</sub>" in Fig. 8. <sup>c</sup> See plot marked "A<sub>28</sub>" in Fig. 8. <sup>d</sup> See plot marked "A<sub>45</sub>" in Fig. 8.

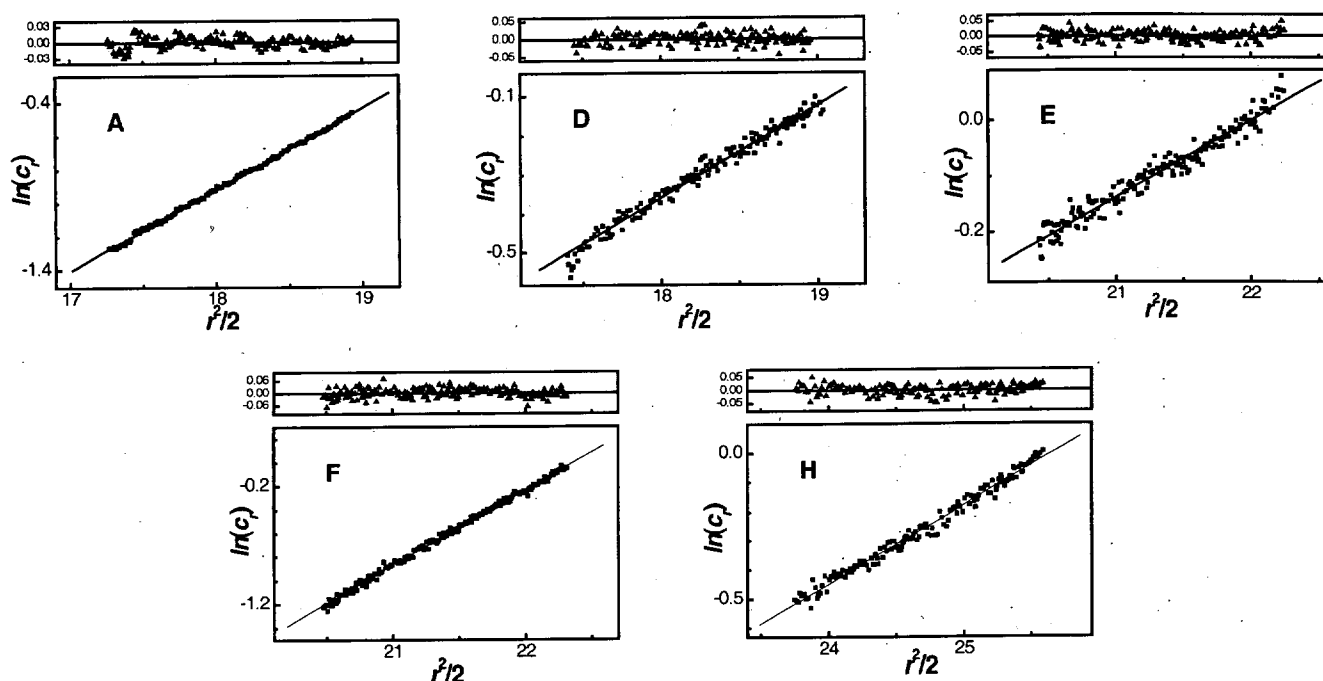

**Figure S1.** Analytical ultracentrifugation results (squares) for alanine conjugates with  $n = 12$  to 45 in pure or deuterated water with and without added sodium chloride. The experimental details are found in Table S3. Each of these plots is fitted to a straight line with negligible residuals (triangles), as expected for unaggregated species.

**Table S4.** Tryptophan Extinction Coefficient Data.

| $m_{80} \times M^{-1} \text{ cm}^{-1}$ |                                |                |      |      |      |                |      |      |      |                      |
|----------------------------------------|--------------------------------|----------------|------|------|------|----------------|------|------|------|----------------------|
| Solvent                                | Number of Solubilizing Lysines |                |      |      |      |                |      |      |      | Average<br>Std. Dev. |
|                                        | 0 <sup>a</sup>                 | 0 <sup>b</sup> | 2    | 3    | 4    | 4 <sup>c</sup> | 5    | 6    | 7    |                      |
| Pure<br>water                          | 5340                           | 5526           | 5494 | 5636 | 5551 | 5459           | 5405 | 5541 | 5566 | 5558<br>118          |
|                                        | 5533                           | 5535           | 5549 | 5629 | 5745 | 5495           | 5673 | 5691 | 5476 |                      |
|                                        | 5397                           | 5623           | 5433 | 5545 | 5835 | 5501           | 5497 | 5556 | 5539 |                      |
|                                        | 5615                           | 5605           | 5460 | 5375 | 5823 | 5465           | 5528 | 5676 | 5441 |                      |
|                                        | 5730                           | 5720           |      |      |      |                |      |      |      |                      |
| 0.1 M<br>NaCl                          | 5610                           | 5542           |      |      | 5583 |                |      |      |      | 5539<br>94           |
|                                        | 5353                           | 5570           |      |      | 5661 |                |      |      |      |                      |
|                                        | 5487                           | 5503           |      |      | 5641 |                |      |      |      |                      |
|                                        | 5415                           | 5545           |      |      | 5622 |                |      |      |      |                      |
|                                        | 5410                           | 5610           |      |      |      |                |      |      |      |                      |
| 6.0 M<br>GuHCl                         | 5768                           | 5792           |      |      | 5758 |                |      |      |      | 5888<br>116          |
|                                        | 5875                           | 5855           |      |      | 6127 |                |      |      |      |                      |
|                                        | 5880                           | 5827           |      |      | 5816 |                |      |      |      |                      |
|                                        | 6070                           | 5970           |      |      | 5920 |                |      |      |      |                      |

<sup>a</sup> Tryptophan acid. <sup>b</sup> Tryptophan amide hydrochloride. <sup>c</sup> WK<sub>4</sub>Inp<sub>2</sub><sup>t</sup>L.

### Mathematical Modeling

All of the mathematical modeling was carried out using Mathematica 3.0 from Wolfram Research. Non-cooperative peptide state sums were generated using Eq S1, setting all  $n_i = 1.0$  for  $i > 0$ , and all  $c_i = 1.0$  for  $i < n$ .

$$SS_n = \begin{pmatrix} 0 & 0 & 0 & 0 & 0 & 0 & 0 & n_0 & 1 \end{pmatrix} \begin{pmatrix} y & tyc_{i+1} & 0 & 0 & 0 & 0 & 0 & 0 & 0 \\ 0 & 0 & n_i & 1 & 0 & 0 & 0 & 0 & 0 \\ 0 & 0 & 0 & 0 & ty & \frac{v}{n_{i-1}} & 0 & 0 & 0 \\ 0 & 0 & 0 & 0 & 0 & 0 & n_i & 1 & 0 \\ y & \frac{v^2}{ty_{i-1}n_{i-2}} & 0 & 0 & 0 & 0 & 0 & 0 & 0 \\ 0 & 0 & n_i & 1 & 0 & 0 & 0 & 0 & 0 \\ 0 & 0 & 0 & 0 & ty & \frac{v}{n_{i-1}} & 0 & 0 & 0 \\ 0 & 0 & 0 & 0 & 0 & 0 & n_i & 1 & 0 \end{pmatrix}^n \begin{pmatrix} 0 \\ 1 \\ 0 \\ 1 \\ 0 \\ 1 \\ 0 \\ 1 \end{pmatrix} \quad (S1)$$

$SS_n$  refers to the state sum for any peptide of length  $n$ ;  $ty$ , the product of a helical initiation parameter  $t$  and a helical propensity  $y$ , is the weight applied to a helical residue sited at a helix terminus;<sup>1,2</sup>  $v$  is the statistical weight applied to a randomly helical residue;  $y$  is the helical

<sup>1</sup> The weight normally assigned a helix terminus by L-R modeling is  $v$ ; the  $ty$  weighting allows N- and C-terminal helical residues to be considered as part of the helical length. Although  $t$  and  $v$  could theoretically be assigned differing values, for the purposes of this study both were assigned values of  $t = v = 0.048$ .

<sup>2</sup> The variable  $y$  is used here for indexing purposes, and is replaced by the conventional helical propensity symbol  $w$  in the cooperativity model.

propensity applied to a residue found in the interior of a helix;<sup>2</sup>  $n_0$  is the N-capping parameter for a 'L residue at the N-terminus of a solubilized, spaced polyalanine, and  $c_{n+1}$  is similarly the C-capping parameter for a 'L. These capping parameters were initially set equal to unity and therefore did not appear in state sums until capping effects were considered.

Rather than conventional 3×3 or 4×4 matrices, these calculations use the 8×8 matrices that we have introduced previously.<sup>3</sup> All these give equivalent polynomial state sums, with two major differences. First, the state weight for a helical conformation of length  $k$  is  $t^2 y^k$ , and second, in the initial state sum calculation, a conventional  $v$  weighting is used for conformations containing isolated helical residues, but a  $t^2$  weight is used for helices. At the evaluation stage of the calculation, we set  $t = v = 0.048$ , according to common usage.<sup>4</sup> The double  $t, v$  weighting system for helix initiation allows easy partitioning of the state sum; for example  $\chi_k$ , the mole fractions of conformations containing uninterrupted helices of length  $k$ , is  $(1/SS_n)(\text{sum of all polynomial terms containing } t^2 y^k \text{ as a coefficient})$  Eq S2.<sup>5</sup> The partitioning of state sums into such terms is rapid and efficient with modern PC-based computational algorithms.

$$\chi_k = \frac{y^k}{SS_n} \sum_{k=3}^n \text{Coefficients in } t^2 \quad (\text{S2})$$

As defined by Eq S1,  $SS_n$  is a polynomial in  $v, t$ , and  $y$  (and  $n_0$  and  $c_{n+1}$ ). We define  $C_k$  as the coefficient of the term  $y^k$  within this polynomial. Fractional helicity ( $f_H$ ) is defined as the average number of helical residues divided by the total number of residues in a peptide, and its explicit expression is displayed in Eq S3.

$$f_H = \frac{1}{n \cdot SS_n} \sum_{k=3}^n k C_k y^k \quad (\text{S3})$$

This equation was used to generate plots of  $f_H$  vs. peptide length.

As noted in the text, the assumption that fractional helicity can be expressed as a simple ratio of  $[\theta]_{222}$  and  $[\theta_n]_{222}$  is false. The precise expression<sup>5</sup> for modeling  $[\theta]_{222}$  is shown in Eq S4

$$[\theta]_{222} = \frac{1}{n \cdot SS_n} \sum_{k=3}^n [\theta_k]_{222} k C_k y^k \quad (\text{S4})$$

in which the  $[\theta_n]_{222}$  term has been moved inside the summation and altered to reflect the limiting ellipticity  $[\theta_k]_{222}$  for each conformation with a helical length  $k$ . The justification for this equation springs from the related Eq 3 of the text. When divided by  $SS_n$  each term in  $C_k y^k$  in Eq S4 equals  $\chi_k$ , the mole fraction of conformations containing a helical region of length  $k$ . Multiplication by  $k/n$  gives the contribution of each such conformation to the overall fractional helicity as seen in

<sup>3</sup> Wallimann, P.; Kennedy, R. J.; Kemp, D. S. *Angew. Chem., Int. Ed.* **1999**, 38, 1290-1292.

<sup>4</sup> Rohl, C. A.; Scholtz, J. M.; York, E. J.; Stewart, J. M.; Baldwin, R. L. *Biochemistry* **1992**, 31, 1263-1269.

<sup>5</sup> This expression uses implicitly the single-helix approximation and therefore very slightly overestimates  $f_H$ .

Eq 4 of the text. Multiplying in the term  $[\theta_k]_{222}$  gives the contribution of the length  $k$  helices to the overall  $[\theta]_{222}$ . Summing over all lengths  $k$  then gives  $[\theta]_{222}$ .

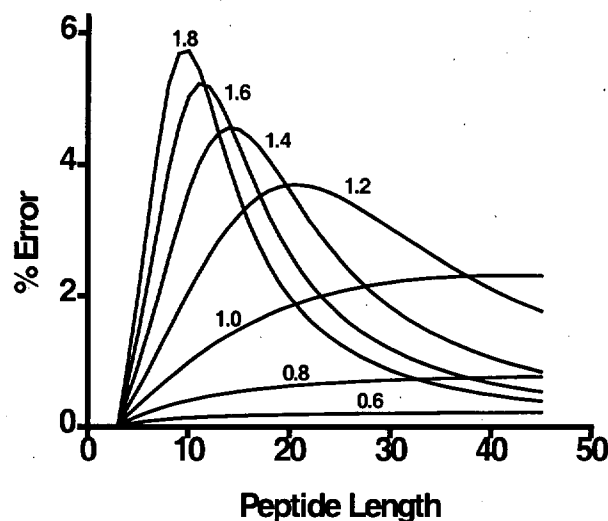

**Figure S2.** Percent error  $(f_H - [\theta]_{222}/[\theta_n]_{222}) \times 100$  associated with standard fractional helicity calculations for homopeptides of varying length and helical propensity. The standard formula for determining  $f_H$  takes the ratio of  $[\theta]_{222}$  to  $[\theta_n]_{222}$ ; a more precise method is based on Eq S4, and requires mathematical modeling. At helical propensities similar to those reported for alanine near 1.6,  $f_H$  for peptides between 10 and 20 residues long is grossly underestimated by the standard calculation.

A plot of the error arising from this modification is shown in Fig. S2 over a length range and for a variety of helical propensities. As noted in the text, a 10 % reduction in least-squares fitting error was obtained when this modification was applied. A further 10 % reduction in error accompanied the inclusion of N- and C-capping values ( $n_0 = c_{n+1} = 0.77$  in Eq S1) for the 'L' residues in the IS regions.

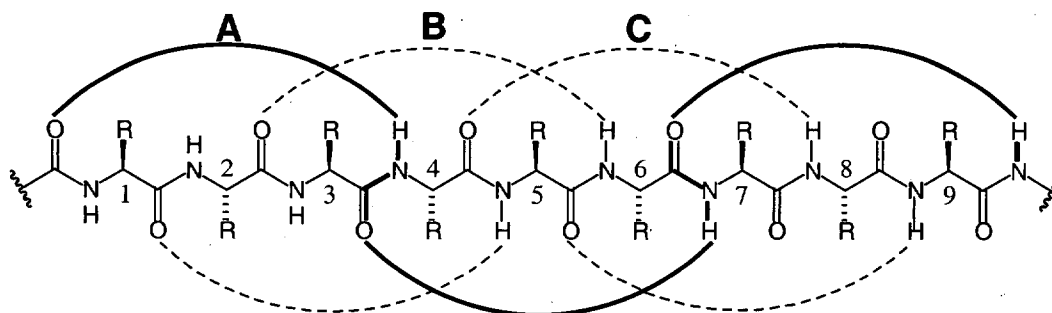

**Figure S3.** A schematic of a 9-residue  $\alpha$ -helix indicating the three independent sets of linked H-bonds. With the ninth residue, chain A grows to three consecutive H-bonds while chains B and C remain at two H-bonds each.

**Cooperativity Model.** As noted in the text, Guo and Karplus<sup>6</sup> have predicted a cooperative effect resulting from unbroken chains of multiple hydrogen bonds. An  $\alpha$ -helix is composed of

<sup>6</sup> Guo, H.; Karplus, M. *J. Phys. Chem.* **1994**, *98*, 7104-7105.

Supporting Information for: Miller, Kennedy, Kemp: Solubilized, Spaced Polyalanines:.....

three independent sets of linked hydrogen bonds as illustrated in Fig. S3. Our cooperativity model assigns an increased statistical weight to the terms in L-R state sums that describe helices long enough to exhibit such H-bonding cooperativity. Modified L-R state sums can thus be expressed according to Eq S5

$$SS'_n = \sum_{k=3}^n \text{Coop}_k C_k y^k + C_0, \quad (\text{S5})$$

with each state containing a helix of length  $k$  now assigned an additional length-dependent weight  $\text{Coop}_k$ ; modified state sums are notated with primes as  $SS'_n$ .

We have observed and modeled the onset of this cooperativity phenomenon for states containing relatively short helical segments using Ac-Hel nucleated peptides.<sup>7</sup> Helical segments up to four residues long (*i.e.*,  $k \leq 4$ ) were each assigned a weight of  $\text{Coop}_k = 1.0$ ;  $\text{Coop}_5 = w^{5(1/3)}$  and  $\text{Coop}_6 = w^{6(2/3)}$  to facilitate a smooth mathematical transition; and states with longer helical segments were assigned a weight  $\text{Coop}_k = w^k$  as expected in standard L-R modeling.

The weights we assigned previously for short helices reflect cooperativity due to a second contiguous H-bond; modeling in the current study modifies the statistical weights for conformations containing at least four consecutive H-bonds.<sup>8</sup> Thus for  $k = 12$  a new cooperativity parameter  $z$  is introduced, with  $\text{Coop}_{12} = zw^{12}$ ; as each additional independent H-bonding chain extends to a length of four, the order in  $z$  is increased, with  $\text{Coop}_{13} = z^2w^{13}$  and  $\text{Coop}_{14} = z^3w^{14}$ . For every state with a longer helical segment of  $k$  residues,  $\text{Coop}_k = z^3w^k$ . Using these modified state sums we generated Eq S6

$$[\theta]_{222} = \frac{1}{n \cdot SS'_n} \sum_{k=3}^n [\theta_k]_{222} k \text{Coop}_k C_k y^k \quad (\text{S6})$$

analogous to Eq S4 for modeling  $[\theta]_{222}$ .<sup>9</sup> It should be noted that the variable  $y$ , used here for indexing purposes only, is assigned a value of 1.0 by the cooperativity model. In effect, the cooperativity state sum expressed in Eq S6 is thus defined recursively in terms of the non-cooperative state sum in Eq S4.

<sup>7</sup> Kennedy, R. J.; Tsang, K. Y.; Kemp, D. S. *J. Am. Chem. Soc.*, in review

<sup>8</sup> Additional parameters may be added for the third and fifth H-bonds as well, but the data is satisfactorily modeled using only one long-chain cooperativity term.

<sup>9</sup> The use of cooperativity terms renders inappropriate the single-helix approximation, which assumes that a peptide conformation is likely to contain only one helical segment. We considered explicitly states with up to three independent helical segments (*i.e.*, those with terms  $t^j y^j$ ,  $j \leq 3$ ), and each was assigned a cooperativity term according to the longest possible single helical segment they could contain. For example, terms in  $t^4 y^{17}$  must describe conformations containing two helical segments of total length 17; one such conformation (with the longest and shortest possible helical segments) contains segments of lengths 3 and 14 residues. Every term in  $t^4 y^{17}$  was assigned a cooperativity term  $\text{Coop}_{14} = z^3w^{14}$  and was multiplied by  $[\theta_{14}]_{222}$ . In general, terms in  $t^j y^k$  were treated explicitly in Eq S6 by assigning cooperativity terms  $\text{Coop}_{k-3(j-1)}$  and multiplying by  $[\theta_{k-3(j-1)}]_{222}$ .
